# Supplementary material
Source: HighWire-hosted journal article supplement (http://www.jneurosci.org/highwire/filestream/598519/field_highwire_adjunct_files/5/Weigelt_SupplTable2.pdf)
Supplement: Weigelt_SupplTable2.pdf [file Weigelt_SupplTable2.pdf]

**Supplementary Table 2. Statistical analysis for Experiment 4**

| <b>Left Hemisphere</b>  |     |           |          |             |          |             |          |             |          |             |          |
|-------------------------|-----|-----------|----------|-------------|----------|-------------|----------|-------------|----------|-------------|----------|
|                         |     | Int < Nov |          | Int < Conex |          | Int < Revex |          | Conex < Nov |          | Revex < Nov |          |
| No.                     | ROI | <i>p</i>  | <i>t</i> | <i>p</i>    | <i>t</i> | <i>p</i>    | <i>t</i> | <i>p</i>    | <i>t</i> | <i>p</i>    | <i>t</i> |
| 1                       | SPC | .05*      | 1.96     | .90         | -0.12    | .51         | 0.65     | .04*        | 2.08     | .19         | 1.31     |
| <b>Right Hemisphere</b> |     |           |          |             |          |             |          |             |          |             |          |
|                         |     | Int < Nov |          | Int < Conex |          | Int < Revex |          | Conex < Nov |          | Revex < Nov |          |
| No.                     | ROI | <i>p</i>  | <i>t</i> | <i>p</i>    | <i>t</i> | <i>p</i>    | <i>t</i> | <i>p</i>    | <i>t</i> | <i>p</i>    | <i>t</i> |
| 2                       | SPC | .03*      | 2.19     | .30         | -1.04    | .35         | -0.93    | .00*        | 3.23     | .00*        | 3.13     |
| 3                       | LOC | .54       | 0.62     | 1.0         | 0.02     | .78         | 0.28     | .55         | 0.59     | .74         | 0.33     |

Statistical values for Experiment 4 for different pairwise comparisons that were computed on pre-defined ROIs (ROI defining contrast rep < nov). \*  $p < .05$ . See also Fig. 5 and the results section ‘Experiment 4’.
